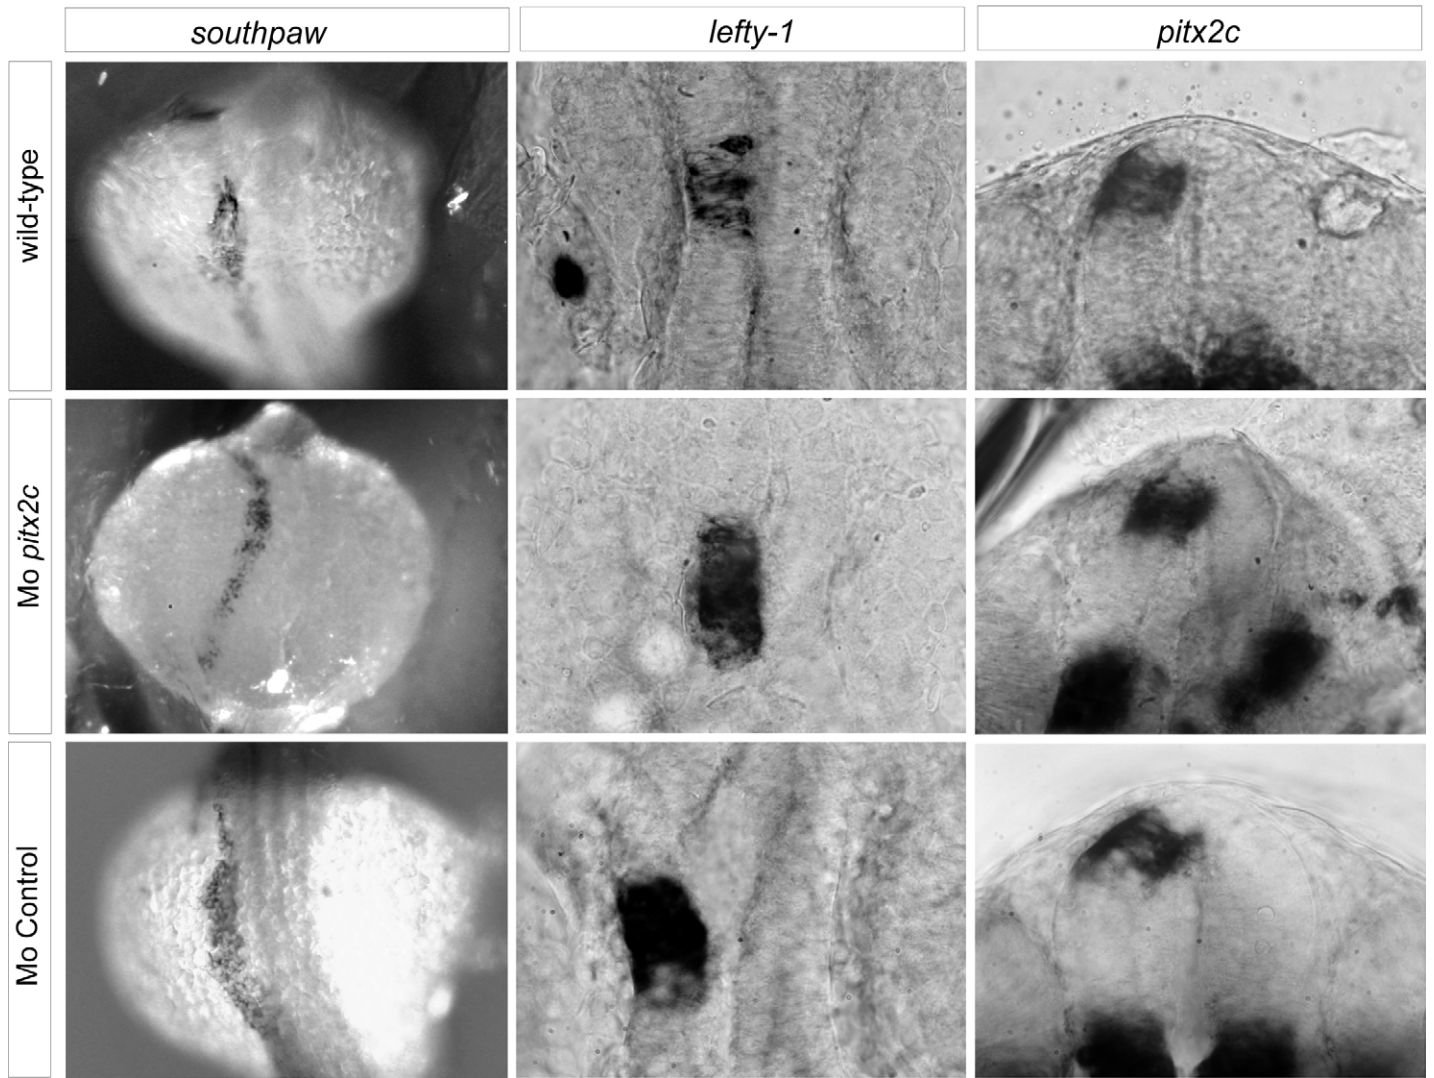

**Supplementary Figure 1.**

No changes are detected in the expression of the Nodal family gene *southpaw* in the left lateral plate mesoderm at 18 hpf, or in the expression of *pitx2c* and the Nodal feedback inhibitor *lefty1* in the left dorsal diencephalons at 24 hpf in *pitx2c* morphants relative to wild-type and control morphants suggesting that the establishment of L/R asymmetry is not generally affected.

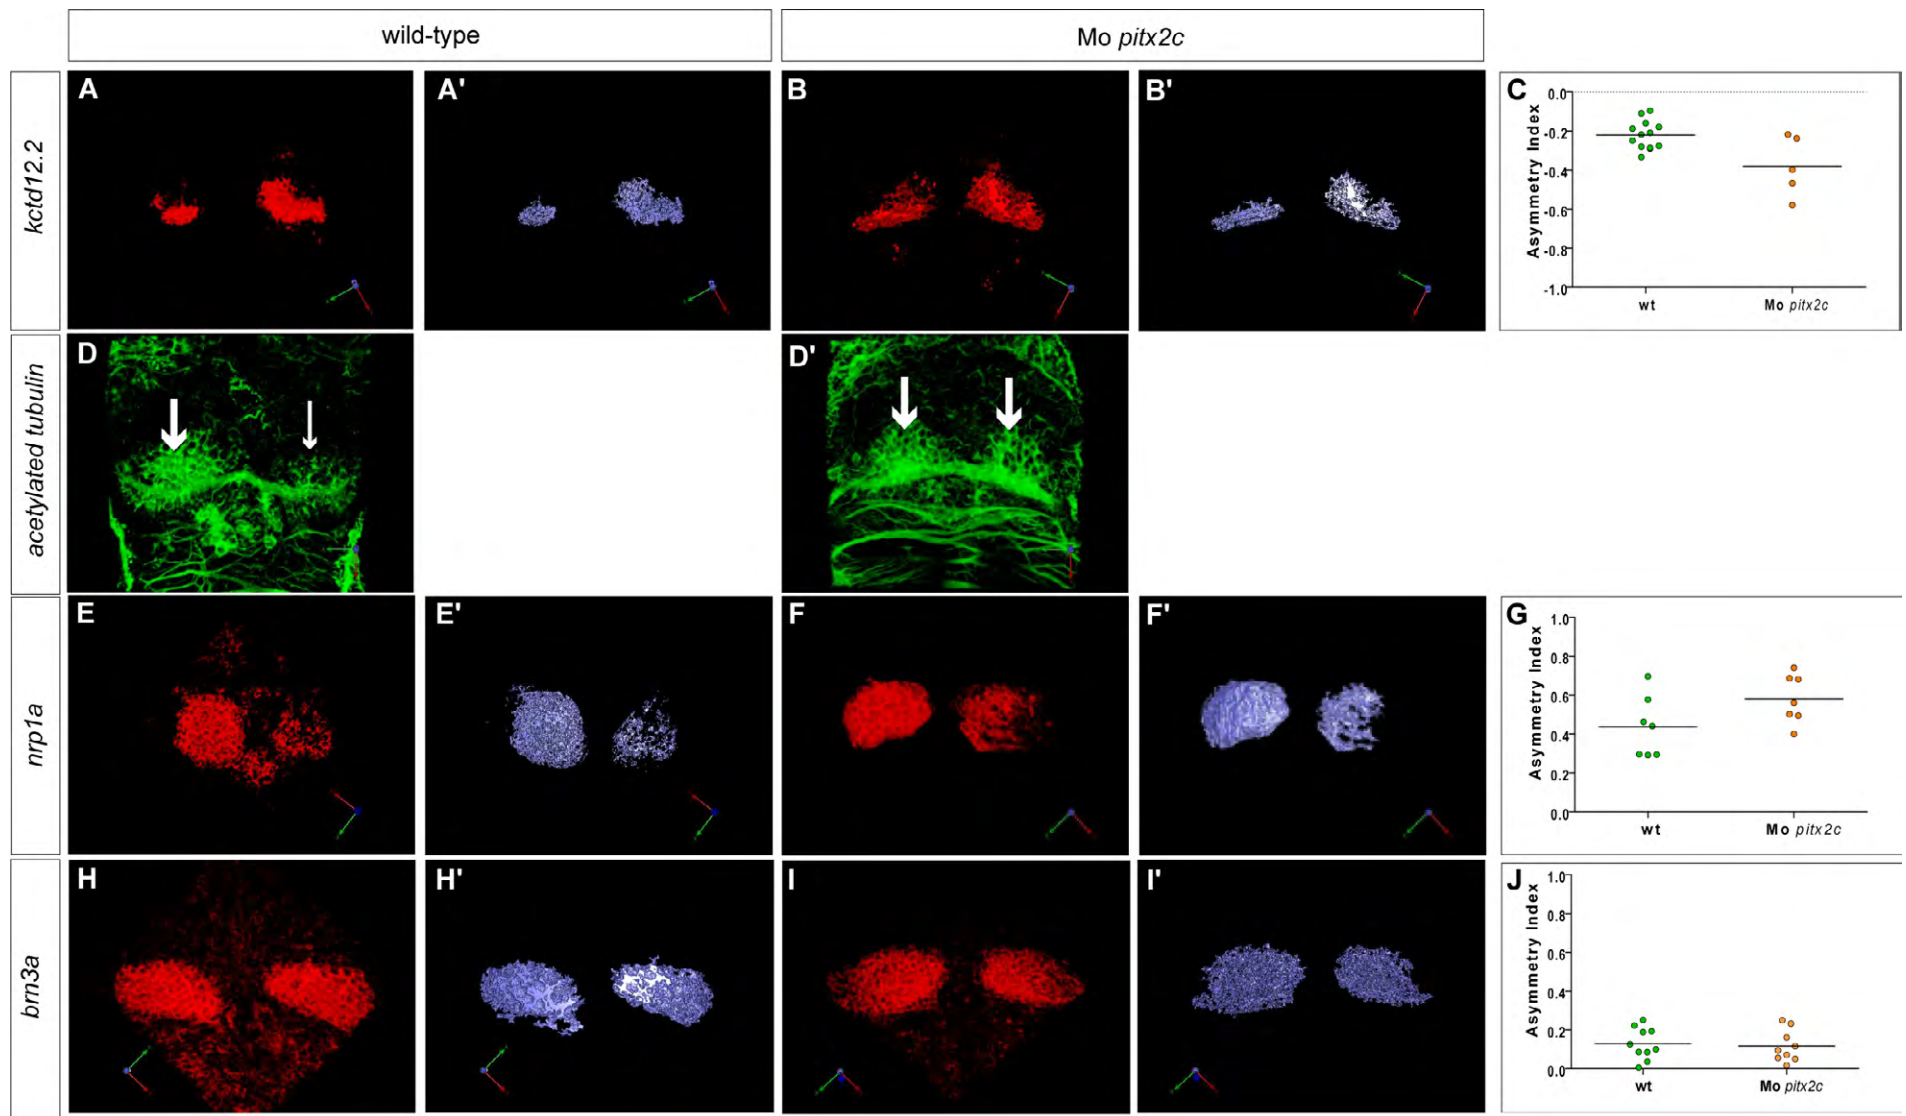

## Supplementary Figure 2.

**(A, B)** Single confocal sections of the epithalamus showing *in situ* hybridisation against *kctd12.2* in wild-type and *pitx2c* morphant embryos at 72 hpf.

**(A', B')** 3D renderings of volumes of *kctd12.2* expression in the habenulae of the respective confocal acquisition sets.

**(C)** Asymmetry index (AI) with regard to the volume of *kctd12.2* expression for individual wild-type or *pitx2c* morphant embryos. Horizontal black line represents the median AI for each context: note that the AI is negative because the asymmetry is biased to the right. No significant difference between wild-type or *pitx2c* morphant embryos is detected.

**(D, D')** Single confocal sections through the epithalamus showing the habenular neuropil detected by immunostaining against acetylated tubulin at 72 hpf. While the neuropil of wild-type embryos is asymmetric with a left bias (large versus small arrows), symmetric anti-acetylated tubulin staining is detected in *pitx2c* morphant embryos (two large arrows).

**(E, F)** Single confocal sections of the epithalamus showing *in situ* hybridisation against *nrp1a* in wild-type and *pitx2c* morphant embryos at 72 hpf.

**(E', F')** 3D renderings of volumes of *nrp1a* expression in the habenulae of the respective confocal acquisition sets.

**(G)** Asymmetry index with regard to the volume of *nrp1a* expression for individual wild-type or *pitx2c* morphant embryos. Horizontal black line represents the median AI for each context. No significant difference between wild-type or *pitx2c* morphant embryos is detected.

**(H, I)** Single confocal sections of the epithalamus showing *in situ* hybridisation against *brn3a* in wild-type and *pitx2c* morphant embryos at 72 hpf.

**(H', I')** 3D renderings of volumes of *brn3a* expression in the habenulae of the respective confocal acquisition sets.

**(J)** Asymmetry index with regard to the volume of *brn3a* expression for individual wild-type or *pitx2c* morphant embryos. Horizontal black line represents the median AI, which are in both contexts close to zero reflecting that they are virtually symmetric. No significant difference between wild-type or *pitx2c* morphant embryos is detected.

Embryos are view dorsally with the anterior to the top.

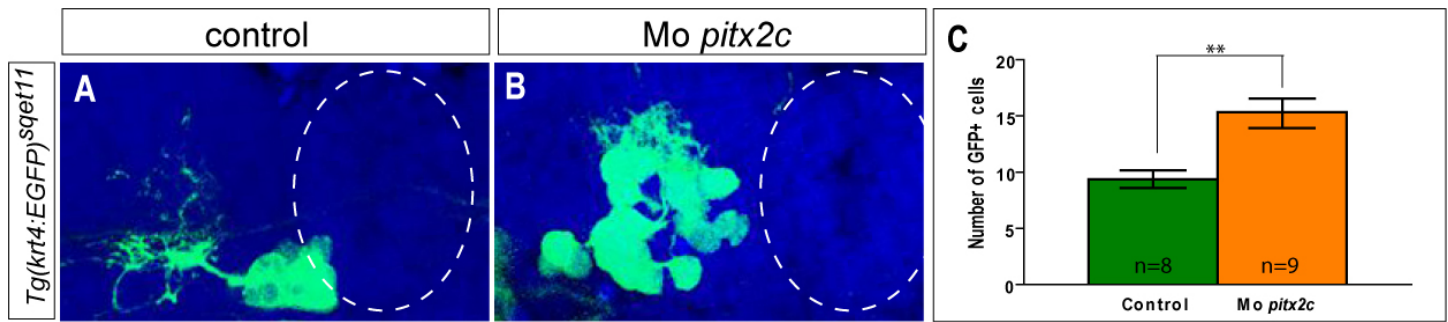

**Supplementary Figure 3.**

(A,B) Confocal projections showing the expression of GFP from the *Et(krt4:EGFP)<sup>sget11</sup>* transgene in control and *pitx2c* morphant embryos at 72 hpf. The outline of the pineal gland is highlight with a dotted line.

(C) Counts of cell expressing GFP in control and *pitx2c* morphants. The number of GFP-positive cells is significantly increased in the morphant context; \*\*P<0.01 using a t-test. Error bars represent s.d.

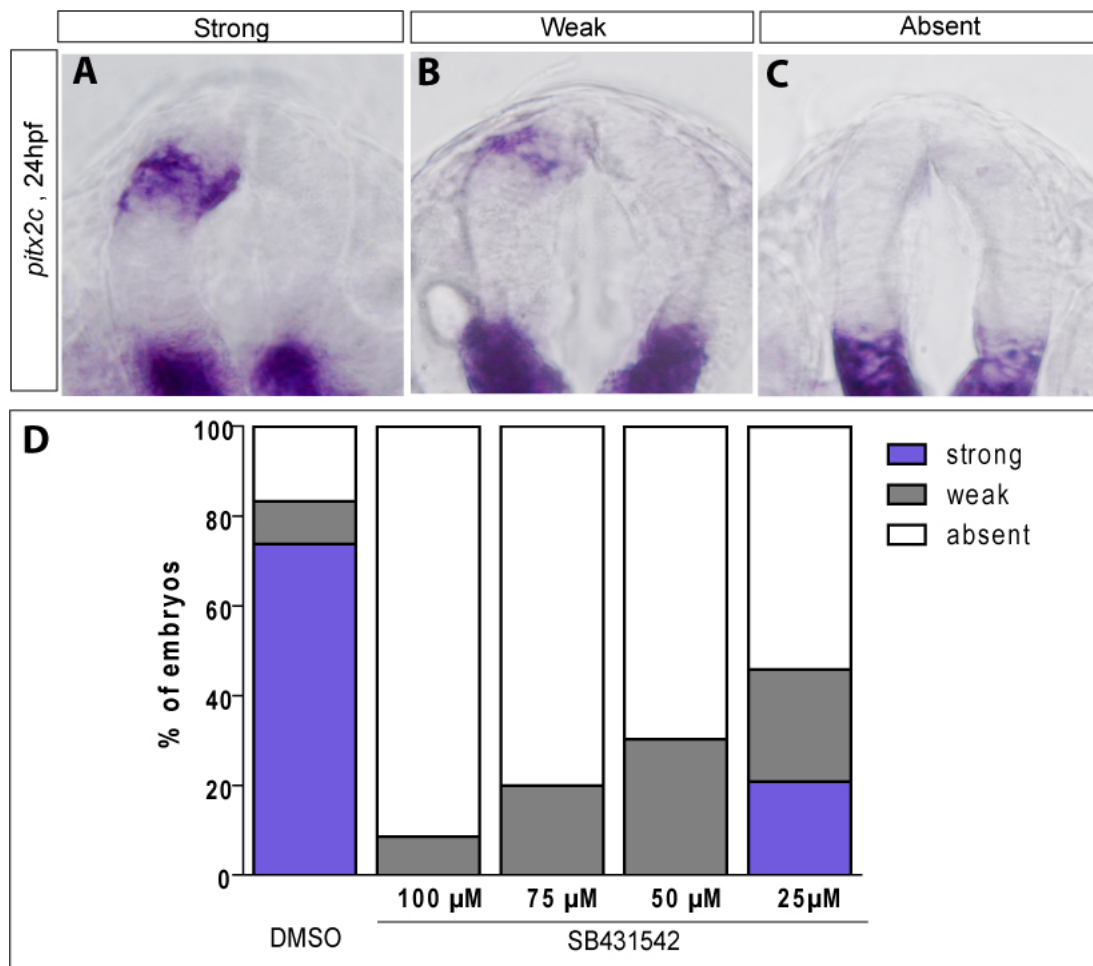

**Supplementary Figure 4.**

(A-C) Frontal view of the epithalamus showing *in situ* hybridisation against *pitx2c* at 24 hpf. Expression can be qualified as Strong (A), Weak (B) or Absent (C).

(D) Quantification of *pitx2c* expression classes presented in (A-C) in mock-treated and embryos treated with varying concentrations of SB431542 from 16 to 72 hpf .

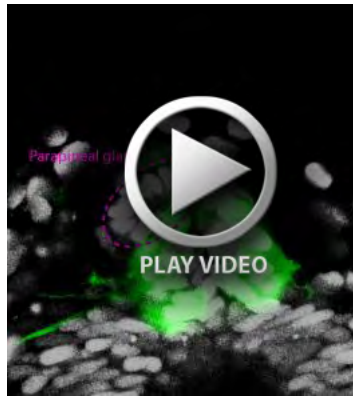

**Movie 1.**

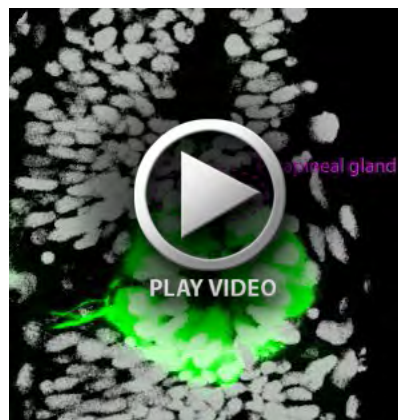

**Movie 2.**

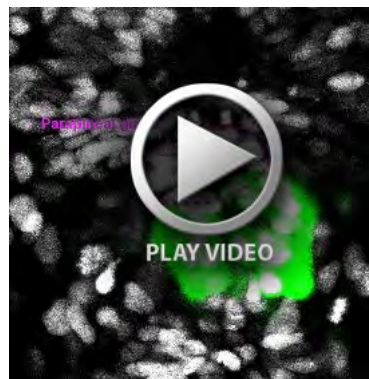

**Movie 3.**

**Supplementary Movies 1 (wild-type), 2 (Mo *pitx2c*) and 3 (Mo *pitx2c*).**

Time-lapse movies showing the migrating parapineal in wild-type and a *pitx2c* morphant embryo carrying the *Tg(foxd3:GFP)<sup>zf15</sup>* transgene; nuclei are labelled with Histone2B:RFP and false coloured in grey. The movies were generated from a projection of 3 Z-sections at each time point. While in the wild-type embryo one cell division is noted during the movie, in the Mo *pitx2c* embryos 4 or 6 divisions can be seen, respectively; divisions are highlighted with purple arrows that appear to split at the time of division. Films were initiated between 24-26 hpf and the initial frame is annotated to indicate the parapineal (dotted line).
